# Supplementary material for: Response of physiological characteristics of ecological restoration plants to substrate cement content under exogenous arbuscular mycorrhizal fungal inoculation
Source: Frontiers journal article supplement (doi:10.3389/fpls.2022.1028553), 2022-11-23

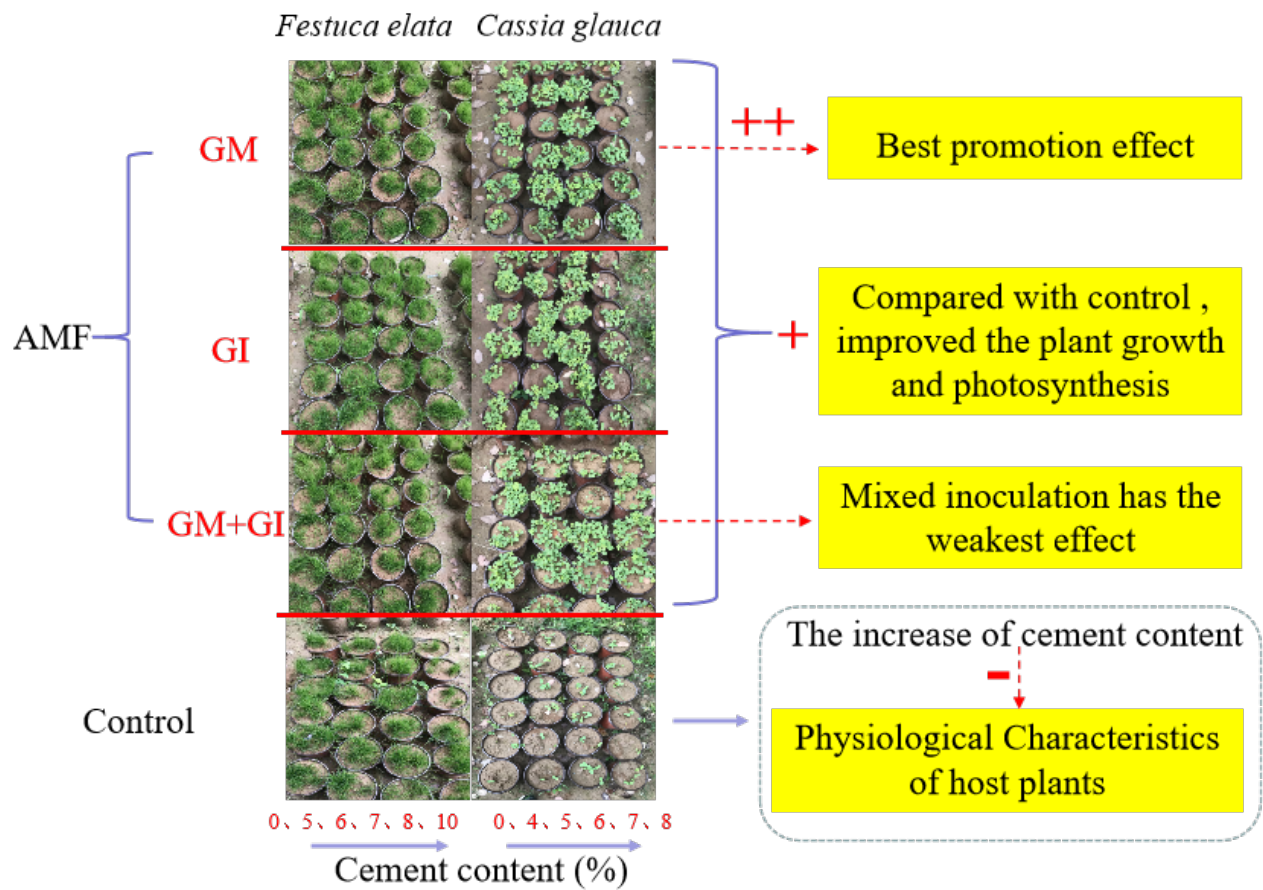

Supplement: Image_1.pdf [file Image_1.pdf]
